# Supplementary material for: “Vision Loss” and COVID-19 Infection: A Systematic Review and Meta-Analysis
Source: MDPI journal article supplement (doi:10.3390/vision6040060), 2022-09-23
Supplement: s1 [file s1]

## Supplementary material S2: Detailed Search Strategy

### PubMed

Free Text

Initial search performed on 30 April 2022

Search updated on 09 June 2022

No limits applied

**Supplementary Table 1.** Search term and search strategy used for paper search

| # | Search Term                 | No. Results |
|---|-----------------------------|-------------|
| 1 | "vision"                    | 229.496     |
| 2 | "loss"                      | 1.095.087   |
| 3 | 1 AND 2                     | 31.468      |
| 4 | "blindness"                 | 51.092      |
| 5 | 3 OR 4                      | 77.454      |
| 6 | " COVID-19" OR "SARS-CoV-2" | 265.396     |
| 7 | 5 AND 6                     | 353         |

Controlled Vocabulary: Medical Subject Headings (MeSH)

Initial search performed on 30 April 2019

Search updated on 9 June 2022

No limits applied

| # | Search Term                                    | No. of Results |
|---|------------------------------------------------|----------------|
| 1 | ("Vision Loss"[MeSH]) AND "COVID-19"[MeSH]     | 38             |
| 2 | ("Blindness"[MeSH]) AND "COVID-19"[MeSH]       | 38             |
| 3 | ("Loss of vision"[MeSH]) AND " COVID-19"[MeSH] | 11             |
| 4 | ("Poor Vision"[MeSH]) AND " COVID-19"[MeSH]    | 136            |
| 5 | ("low vision"[MeSH]) AND " COVID-19"[MeSH]     | 11             |

All MeSH search results had already been found in the free-text search.

### Embase

Free Text

Initial search performed on 30 April 2022

Search updated on 09 June 2022

[embase]/lim, no other limits applied

Mapping options enabled:

- map to preferred term in Emtree
- search also as free text in all fields
- explode using narrower Emtree terms

search as broadly as possible

| # | Search Term                                                                  | No. of Results |
|---|------------------------------------------------------------------------------|----------------|
| 1 | ((("vision") AND ("loss) OR ("blindness") AND (" COVID-19" OR "SARS-CoV-2")) | 489            |

### Scopus

Free Text

Initial search performed on 30 April 2022

Search updated on 9 June 2022

| # | Search Term                                                                                                                              | No. of Results |
|---|------------------------------------------------------------------------------------------------------------------------------------------|----------------|
| 1 | TITLE-ABS-KEY("vision") AND TITLE-ABS-KEY ("loss") OR<br>(TITLE-ABS-KEY ("blindness")) AND TITLE-ABS-KEY<br>("COVID-19" OR "SARS-CoV-2") | 301            |
