# Supplementary material for: “Vision Loss” and COVID-19 Infection: A Systematic Review and Meta-Analysis
Source: MDPI journal article supplement (doi:10.3390/vision6040060), 2022-09-23
Supplement: s1 [file s1]

## Supplementary Material S4: risk of bias evaluation

**Table 1: Newcastle–Ottawa Scale for Critical Appraisal of Cross-Sectional Studies**

| Source                      | Study design    | Selection                        |             |                 | Ascertainment of exposure | Comparability                | Outcome               |                  | Total score |
|-----------------------------|-----------------|----------------------------------|-------------|-----------------|---------------------------|------------------------------|-----------------------|------------------|-------------|
|                             |                 | Representativeness of the sample | Sample size | Non-respondents |                           | Based on design and analysis | Assessment of outcome | Statistical test |             |
| Carcamo Garcia et al., 2021 | Cross-sectional | +1 (b)                           | +1 (a)      | +2 (a)          | 0 (c)                     | +1 (a)                       | +1 (c)                | 0 (b)            | 6/10        |
| Mani et al., 2022           | Cross-sectional | +1 (b)                           | +1 (a)      | +2 (a)          | 0 (c)                     | +1 (a)                       | +1 (c)                | 0 (b)            | 6/10        |

Representativeness of the sample: a) Truly representative of the average in the target population. b) Somewhat representative of the average in the target population; c) Selected group of usersd) No description of the sampling strategy; Sample size: a) Justified and satisfactory. b) Not justified; Non-respondents: a) Comparability between respondents and non-respondents characteristics is established, and the response rate is satisfactory. b) The response rate is unsatisfactory, or the comparability between respondents and non-respondents is unsatisfactory. c) No description of the response rate or the characteristics of the responders and the non-responders; Ascertainment of the exposure: a) Validated measurement tool. b) Non-validated measurement tool, but the tool is available or described. c) No description of the measurement tool; Comparability: 1) The subjects in different outcome groups are comparable, based on the study design or analysis. Confounding factors are controlled. a) The study controls for the most important factor (select one). b) The study control for any additional factor; Outcome: 1) Assessment of the outcome: a) Independent blind assessment; b) Record linkage; c) Self report; d) No description. 2) Statistical test: a) The statistical test used to analyze the data is clearly described and appropriate, and the measurement of the association is presented, including confidence intervals and the probability level (p value); b) The statistical test is not appropriate, not described or incomplete.

**Table 2: Joanna Briggs Institute Critical Appraisal Checklist for Case Reports**

[illegible]

**Table 3: Quality assessment of the included case series using the Joanna Briggs Institute (JBI) Critical Appraisal Checklist for Case Series**

[illegible]
